# Supplementary material
Source: PubMed Central journal article supplement (PMC5553618)
Supplement: NIHMS856610-supplement-S1.pdf [file NIHMS856610-supplement-S1.pdf]

Supplementary Figure 1

| Patient     | Cycle 1      |       |        |     |       |       |        |     |       |       |        |     |
|-------------|--------------|-------|--------|-----|-------|-------|--------|-----|-------|-------|--------|-----|
|             | Pretreatment |       |        |     | D5    |       |        |     | D15   |       |        |     |
|             | blood        | urine | saliva | a/s | blood | urine | saliva | a/s | blood | urine | saliva | a/s |
| 011-01-0101 | -            | -     | -      | -   | +     | -     | -      | -   | -     | -     | -      | -   |
| 011-01-0102 | -            | -     | -      | -   | -     | -     | -      | -   | -     | -     | -      | -   |
| 011-02-0103 | -            | -     | -      | -   | -     | -     | -      | -   | -     | -     | -      | -   |
| 011-01-0201 | -            | -     | -      | -   | -     | -     | -      | -   | -     | -     | -      | -   |
| 011-01-0202 | -            | -     | -      | -   | -     | -     | -      | -   | -     | -     | -      | -   |
| 011-01-0203 | -            | -     | -      | -   | -     | -     | -      | -   | -     | -     | -      | -   |
| 011-01-0204 | -            | -     | -      | -   | -     | -     | -      | -   | -     | -     | -      | -   |
| 011-02-0301 | -            | -     | -      | -   | -     | +     | -      | -   | -     | -     | -      | -   |
| 011-01-0302 | -            | -     | -      | -   | -     | -     | -      | -   | -     | -     | -      | -   |
| 011-02-0303 | -            | -     | -      | -   | -     | -     | -      | -   | -     | -     | -      | -   |
| 011-01-0304 | -            | -     | -      | -   | -     | -     | -      | -   | -     | -     | -      | -   |
| 011-01-0305 | -            | -     | -      | -   | -     | -     | -      | -   | -     | -     | -      | -   |
| 011-02-0307 | -            | -     | -      | -   | -     | -     | -      | -   | -     | -     | -      | -   |
| 011-02-0308 | -            | -     | -      | -   | -     | -     | -      | -   | -     | -     | -      | -   |

| Patient     | Cycle 2 |       |        |     |       |       |        |     |       |       |        |     |
|-------------|---------|-------|--------|-----|-------|-------|--------|-----|-------|-------|--------|-----|
|             | D1      |       |        |     | D5    |       |        |     | D15   |       |        |     |
|             | blood   | urine | saliva | a/s | blood | urine | saliva | a/s | blood | urine | saliva | a/s |
| 011-01-0101 | -       | -     | -      | -   | -     | -     | -      | -   | -     | -     | -      | -   |
| 011-01-0102 | -       | -     | -      | -   | -     | -     | -      | -   | -     | -     | -      | -   |
| 011-02-0103 | -       | -     | -      | -   | -     | -     | -      | -   | -     | -     | -      | -   |
| 011-01-0201 | -       | -     | -      | -   | -     | -     | -      | -   | -     | -     | -      | -   |
| 011-01-0202 | -       | -     | -      | -   | -     | -     | -      | -   | -     | -     | -      | -   |
| 011-01-0203 | -       | -     | -      | -   | -     | -     | -      | -   | -     | -     | -      | -   |
| 011-01-0204 | -       | -     | -      | -   | -     | -     | -      | -   | -     | -     | -      | -   |
| 011-02-0301 | -       | -     | -      | -   | -     | +     | -      | -   | -     | -     | -      | -   |
| 011-01-0302 | -       | -     | -      | -   | -     | -     | -      | -   | -     | -     | -      | -   |
| 011-02-0303 | -       | -     | -      | -   | +     | -     | -      | -   | -     | -     | -      | -   |
| 011-01-0304 | -       | -     | -      | -   | -     | -     | -      | -   | -     | -     | -      | -   |
| 011-01-0305 | -       | -     | -      | -   | -     | -     | -      | -   | -     | -     | -      | -   |
| 011-02-0307 | -       | -     | -      | -   | -     | -     | -      | -   | -     | -     | -      | -   |
| 011-02-0308 | -       | -     | -      | -   | -     | -     | -      | -   | -     | -     | -      | -   |
