# Supplementary material
Source: PubMed Central journal article supplement (PMC5553618)
Supplement: NIHMS856610-supplement-S_Legends.pdf [file NIHMS856610-supplement-S_Legends.pdf]

**Supplementary Figure 1:** Viral shedding was negative in ten patients and only three patients had positive signal either in urine or blood samples on day 5. No positive signal was observed in any sample on day 15.

**Supplementary Figure 2:** Fold increase in reovirus antibody titre. Graph shows the fold increase in reovirus antibodies over pre-treatment (blue) at day 15 of cycle 1 (green), day 15 of cycle 2 (purple) and peak (red). Note the staggered antibody response in patients 102, 103, 204 and 305.

**Supplementary Figure 3:** Representative examples of NARA titers from each cohort (graph A: Cohort 1, graph: Cohort 2, graph C: Cohort 3) during treatment. These graphs show a late increase in NARA antibodies during the treatment cycles.
