# Supplementary material
Source: PubMed Central journal article supplement (PMC5553618)

Supplementary Figure 2.

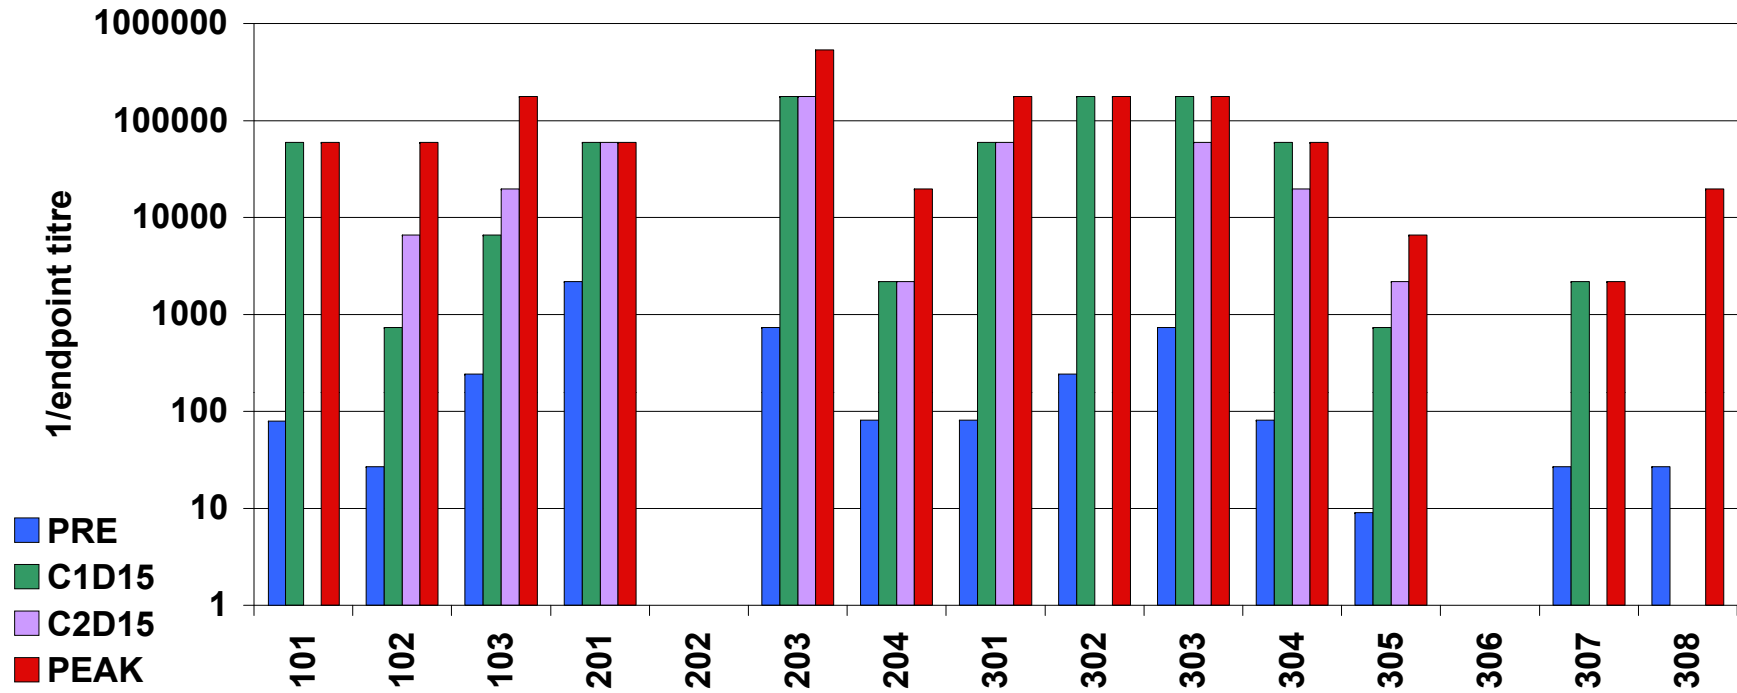

Supplement: NIHMS856610-supplement-S2.pdf [file NIHMS856610-supplement-S2.pdf]

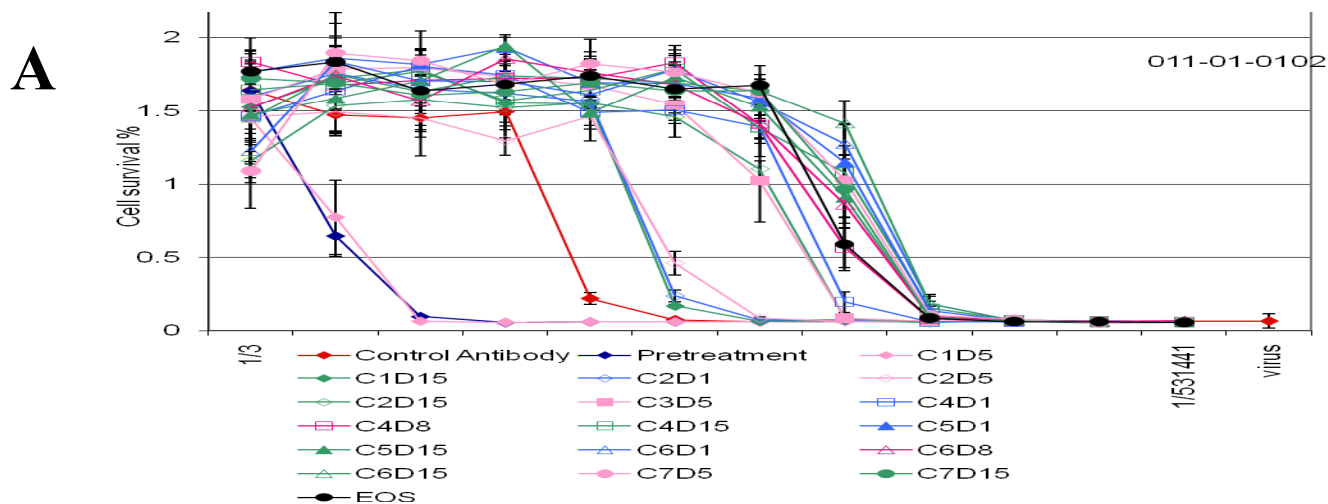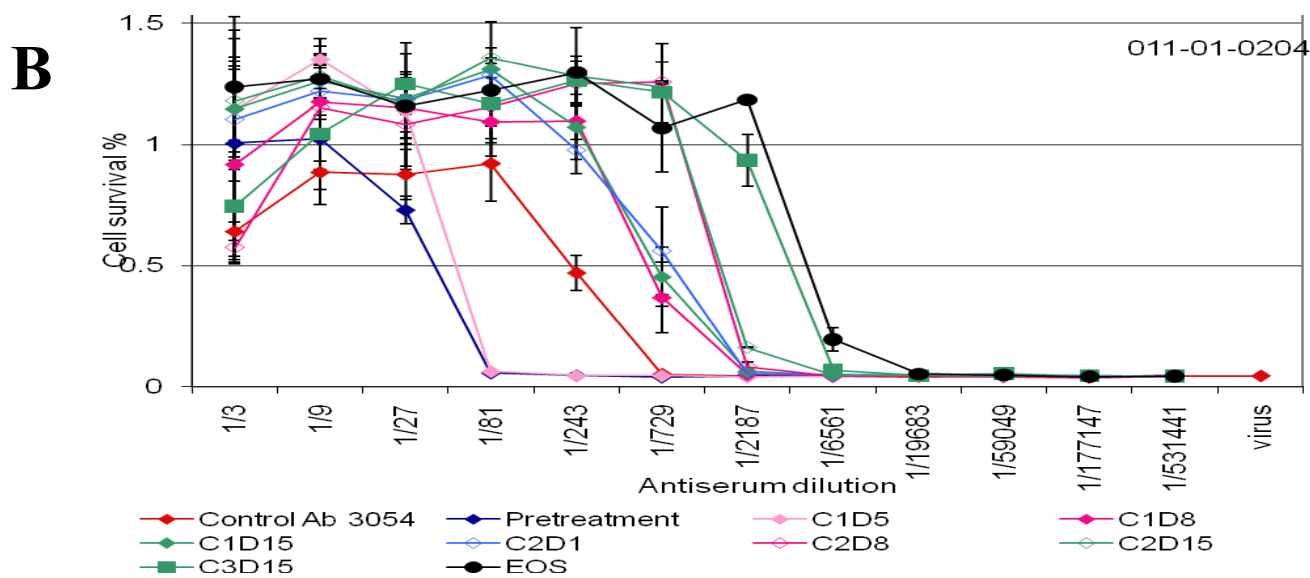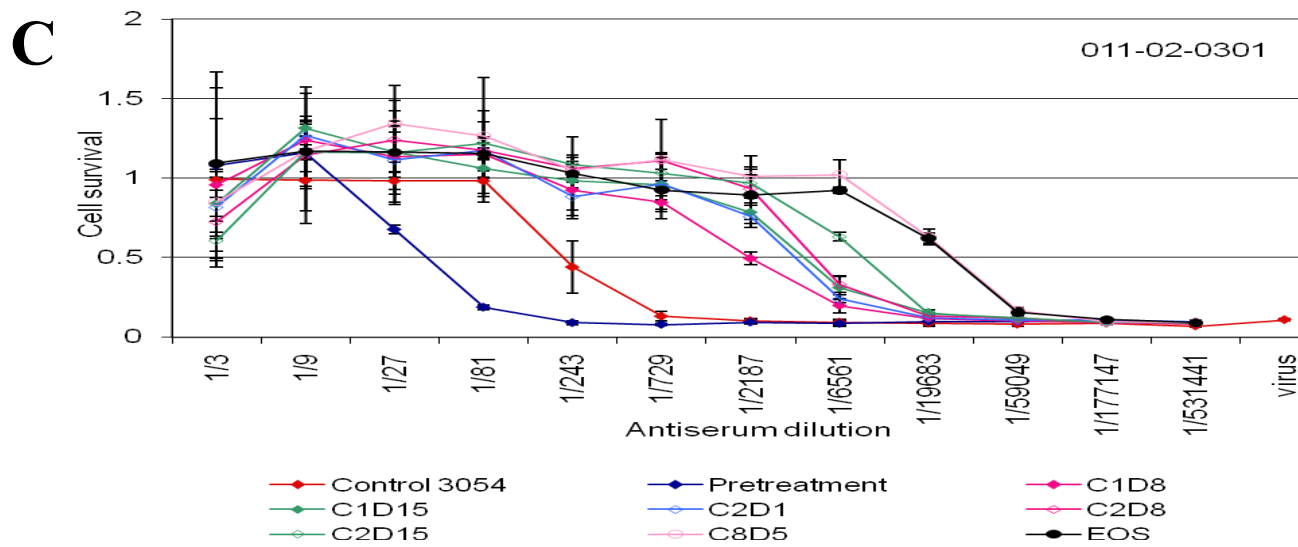

Supplement: NIHMS856610-supplement-S3.pdf [file NIHMS856610-supplement-S3.pdf]
